# Supplementary material for: Development and internal validation of a novel predictive model for SDHB mutations in pheochromocytomas and retroperitoneal paragangliomas
Source: PubMed Central journal article supplement (PMC10764617; doi:10.3389/fendo.2023.1285631), 2023-12-21
Supplement: Image_2.pdf [file Image_2.pdf]

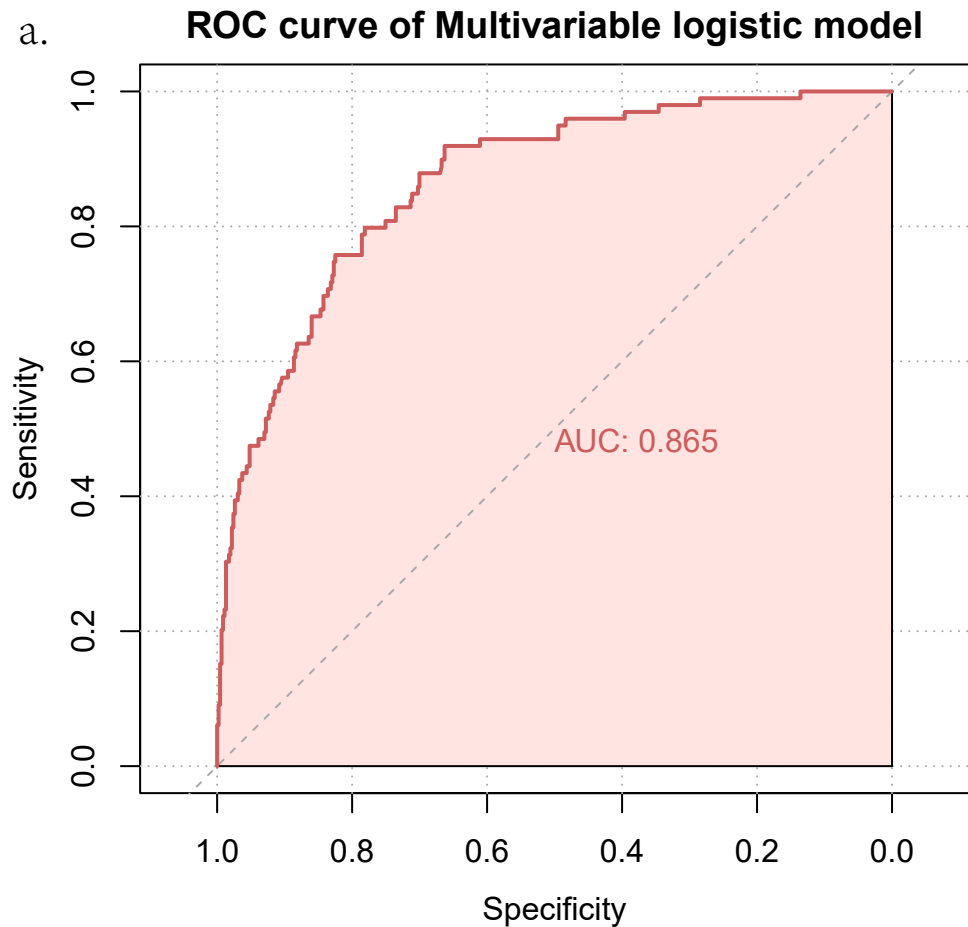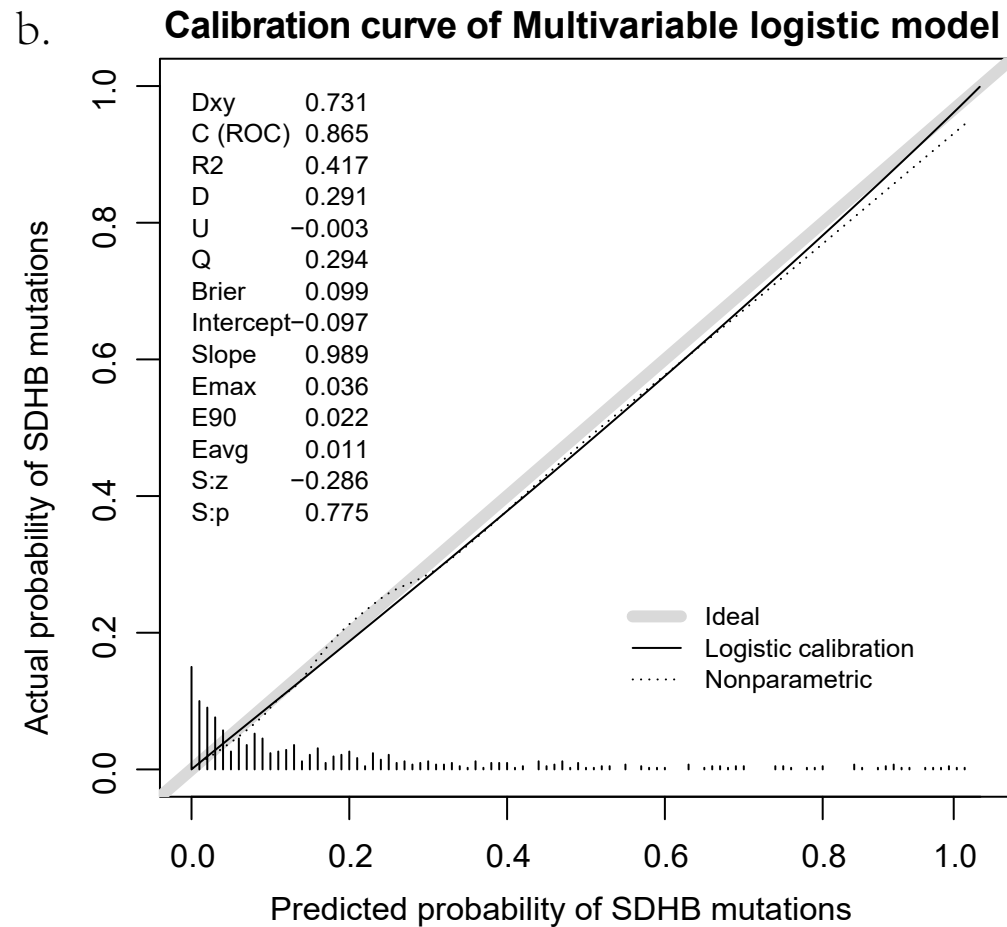

**The Supplemental Figure 2. a.** The ROC curve and its AUC and **b.** the calibration curve of the established multivariable logistic model evaluated in a randomly selected dataset after multiple imputation.
